# Supplementary material for: Variation in Rice Plastid Genomes in Wide Crossing Reveals Dynamic Nucleo–Cytoplasmic Interaction
Source: MDPI journal article supplement (doi:10.3390/genes14071411), 2023-07-08
Supplement: s1 [file s1]

**Table S1. Summary of sequencing plastomes by Illumina**

| Sample               | Clean reads | Clean bases (bp) | Read length (bp) | Sequencing depth<br>(×) |
|----------------------|-------------|------------------|------------------|-------------------------|
| <i>O. glaberrima</i> | 777,259     | 101,593,300      | 125/150          | ~755                    |
| P10                  | 895,911     | 134,386,650      | 150              | ~999                    |
| P88                  | 1,001,710   | 150,256,500      | 150              | ~1116                   |
| P90                  | 1,827,040   | 274,056,000      | 150              | ~2036                   |
| P91                  | 232,567     | 34,885,050       | 150              | ~259                    |
| P92                  | 259,070     | 38,860,500       | 150              | ~289                    |

**Table S2. Summary of sequencing plastomes by PicBio**

| Sample               | Clean reads | Clean bases (bp) | Average<br>length (bp) | read<br>Sequencing<br>depth (×) |
|----------------------|-------------|------------------|------------------------|---------------------------------|
| <i>O. glaberrima</i> | 673         | 8,107,631        | 12,047                 | ~60                             |
| P10                  | 119         | 1,607,928        | 13,512                 | ~12                             |
| P88                  | 254         | 3,477,260        | 13,690                 | ~26                             |
| P90                  | 657         | 8,807,742        | 13,406                 | ~65                             |
| P91                  | 186         | 2,000,430        | 10,755                 | ~15                             |
| P92                  | 104         | 1,452,360        | 13,965                 | ~11                             |

**Table S3. All repeats detected in *Oryza glaberrima* plastome**

| Repeat name | Start site | End site | Length | Distance from<br>the nearest genes |
|-------------|------------|----------|--------|------------------------------------|
| R01         | 82656      | 82746    | 91     | ≤2 Kb                              |
| R02         | 55851      | 55941    | 91     | ≤2 Kb                              |
| R03         | 82882      | 82941    | 60     | ≤2 Kb                              |
| R04         | 55792      | 55850    | 60     | ≤2 Kb                              |
| R05         | 44495      | 44523    | 29     | ≤2 Kb                              |
| R06         | 7833       | 7861     | 29     | ≤2 Kb                              |
| R07         | 19882      | 19907    | 26     | >2 Kb                              |
| R08         | 14449      | 14474    | 26     | ≤2 Kb                              |
| R09         | 46084      | 46106    | 23     | ≤2 Kb                              |
| R10         | 45575      | 45597    | 23     | ≤2 Kb                              |

|     |       |       |    |       |
|-----|-------|-------|----|-------|
| R11 | 17388 | 17409 | 22 | ≤2 Kb |
| R12 | 17352 | 17373 | 22 | ≤2 Kb |
| R13 | 44498 | 44518 | 21 | ≤2 Kb |
| R14 | 11513 | 11533 | 21 | ≤2 Kb |
| R15 | 15109 | 15129 | 21 | ≤2 Kb |
| R16 | 45721 | 45741 | 21 | ≤2 Kb |

**Table S4. Category of multi-copy repeats in *Oryza glaberrima* plastome**

| Repeat | Length (bp) | Start site | End site |
|--------|-------------|------------|----------|
| CRS1-1 | 91          | 82656      | 82746    |
| CRS1-2 | 91          | 55851      | 55941    |
| CRS2-1 | 60          | 82882      | 82941    |
| CRS2-2 | 60          | 55792      | 55850    |
| CRS3-1 | 29          | 44495      | 44523    |
| CRS3-2 | 29          | 7833       | 7861     |
| CRS4-1 | 26          | 19882      | 19907    |
| CRS4-2 | 26          | 14449      | 14474    |
| CRS5-1 | 23          | 46084      | 46106    |
| CRS5-2 | 23          | 45575      | 45597    |
| CRS6-1 | 22          | 17388      | 17409    |
| CRS6-2 | 22          | 17352      | 17373    |
| CRS7-1 | 21          | 44498      | 44518    |
| CRS7-2 | 21          | 11513      | 11533    |
| CRS8-1 | 21          | 15109      | 15129    |
| CRS8-2 | 21          | 45721      | 45741    |

**Table S5. RNA editing events detected in plastid of BIL lines**

| Category              | Editing events | Number | Percentage |
|-----------------------|----------------|--------|------------|
| Nucleotide transition | C-to-U         | 52     | 70.3%      |
|                       | U-to-C         | 22     | 29.7%      |
| Edited triplet site   | 1st            | 14     | 18.9%      |
|                       | 2nd            | 34     | 45.9%      |
|                       | 3rd            | 26     | 35.1%      |
| Amino acid alteration | Synonymous     | 23     | 31.1%      |
|                       | Nonsynonymous  | 51     | 68.9%      |

**Table S6. Confirmation of RNA editing using Sanger sequencing**

| Examined          | <i>O. glaberrima</i> |      |        |         | BIL lines  |      |        | Tested  |      |
|-------------------|----------------------|------|--------|---------|------------|------|--------|---------|------|
| editing sites     | Editing              | rate | Edited | Editing | Editing    | rate | Edited | Editing | line |
|                   | by RNA-Seq           |      | clone  | rate    | by RNA-Seq |      | clone  | rate    |      |
| <i>matK</i> -1351 | 30.8%                |      | 9/50   | 18%     | 80.0%      |      | 33/50  | 66%     | P91  |
| <i>ndhA</i> -1070 | 20.9%                |      | 12/50  | 24%     | 62.1%      |      | 40/50  | 80%     | P90  |
| <i>rpoB</i> -545  | 32.2%                |      | 36/50  | 72%     | 57.1%      |      | 40/50  | 80%     | P10  |

Note: In the Sanger sequencing, each editing site were sequenced 50 separate clones.
