# Supplementary material for: Variation in Rice Plastid Genomes in Wide Crossing Reveals Dynamic Nucleo–Cytoplasmic Interaction
Source: MDPI journal article supplement (doi:10.3390/genes14071411), 2023-07-08
Supplement: s1 [file s1]

**All primers used in the experiment**

| Name     | Sequence (5' to 3')    |
|----------|------------------------|
| CRS1ab-F | TCAGATTGAGCCGAGTTT     |
| CRS1ab-R | TCACGATTGTGCCTGTTA     |
| CRS1cd-F | TCGGGATTCACTAAGACA     |
| CRS1cd-R | TTACGACCTTTACCACAA     |
| CRS2ab-F | CGGGATTCTCTATTCTA      |
| CRS2ab-R | TCACGATTGTGCCTGTTA     |
| CRS2cd-F | GCATAGGAGGGAAAGTCG     |
| CRS2cd-R | GAATAACCCGTTGAAGG      |
| CRS3ab-F | AAACCCTGAACCAGGAGC     |
| CRS3ab-R | AAGCGGATTTGTTGAAGC     |
| CRS3cd-F | CAATACATCTCGCGGTAA     |
| CRS3cd-R | TCATCAGCTATGGGTTCA     |
| CRS4ab-F | CGATAACGGGACATGAAG     |
| CRS4ab-R | ATTTGTAATGCGAGGGTC     |
| CRS4cd-F | ATAATGATGGACTGAAAA     |
| CRS4cd-R | CGGACGAATAATCTAATA     |
| CRS5ab-F | AAATGTGCGATATGTTGG     |
| CRS5ab-R | GAGTGGACTCTAGGGATA     |
| CRS5cd-F | GGAGTGGACTCTAGGGATA    |
| CRS5cd-R | AAATGTGCGATATGTTGG     |
| CRS6ab-F | GGCTCGGTTATTCTATCT     |
| CRS6ab-R | CGTATGGCTATGTTCTATTT   |
| CRS6cd-F | AACAGAAATGGATTAACCCTAG |
| CRS6cd-R | AAGGCGTAGCATTGGAACGTG  |
| CRS7ab-F | ATGGGAAATGAAAGTGGC     |
| CRS7ab-R | CCCTGCTTCGCTTAGTGT     |
| CRS7cd-F | AGGTTAGAGCATCGCATTT    |
| CRS7cd-R | TCCTGGCTTCTCCATTTA     |
| CRS8ab-F | GCCTCATCTCGAACAAAT     |
| CRS8ab-R | ATCAGAATCAATCGCTCA     |
| CRS8cd-F | TCTATACTAGGACCTTTACC   |
| CRS8cd-R | CCATATTAGGCTATTTACAC   |

|            |                        |
|------------|------------------------|
| action-F   | AGACCACCTACAACCTCTATCA |
| action-R   | TTCCTCCACTAAGCACAA     |
| rpl33-F    | AGTCGGCAGGGATTCTA      |
| rpl33-R    | TTTCGGCATGAATCGTAT     |
| psbZ-F     | AGTCATTAGTGTACCCCTTG   |
| psbZ-R     | GAAAGACCAGTCCAATCC     |
| psbK-F     | TTATGCGATTTTCAACCC     |
| psbK-R     | TCATCGAAAACCTTACAGC    |
| atpF-F     | AATGCCACTTCTATTAGTTTGG |
| atpF-R     | GCTCCTTGTACGGCTTGT     |
| ndhD-F     | TTTTGGCTTCCTTATTGC     |
| ndhD-R     | CGTATGCTCCCATCTTTA     |
| petA-F     | CTTGGGTAAAGGAACAGA     |
| petA -R    | CAGGCTTATTCGCTAAAT     |
| matK1351-F | ACTCAACCGCAAAGGATC     |
| matK1351-R | CAAATACCAAATACGCTCA    |
| ndhA1070-F | GAGGAAGAATTAGTAGCA     |
| ndhA1070-R | TATAGTGAAACAAGTTGG     |
| rpoB-545-F | TATTGCTAAGTCCTGGTAT    |
| rpoB-545-R | AGTTTGTGGAGTCGGTTT     |

---
