# Supplementary figures and images for: Variation in Rice Plastid Genomes in Wide Crossing Reveals Dynamic Nucleo–Cytoplasmic Interaction
Source: MDPI journal article supplement (doi:10.3390/genes14071411), 2023-07-08

***O. glaberrima***

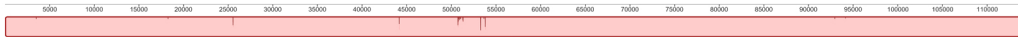

**P10**

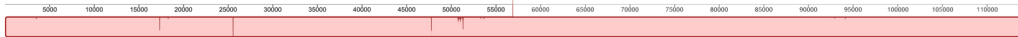

**P88**

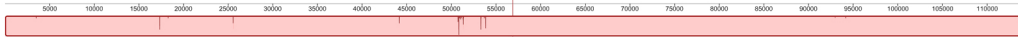

**P90**

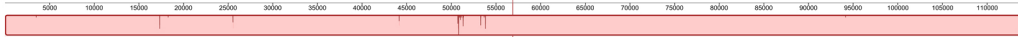

**P91**

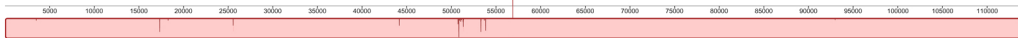

**P92**

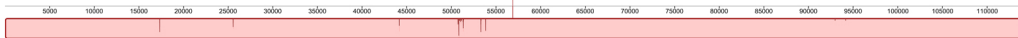

**LSC**

**IR**

**SSC**

Supplement: s1 [file s1]

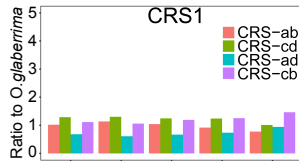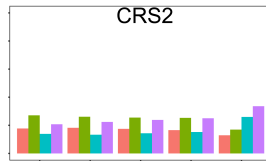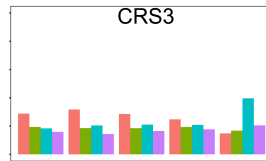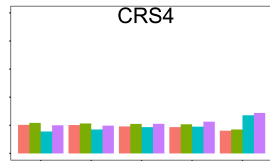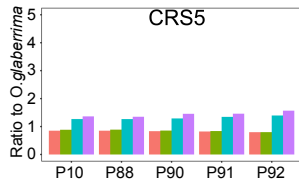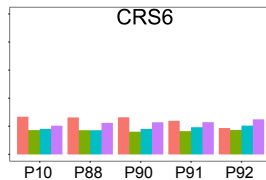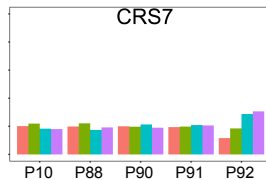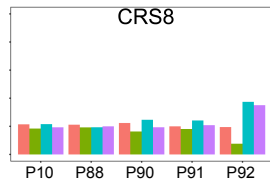

Supplement: s1 [file s1]

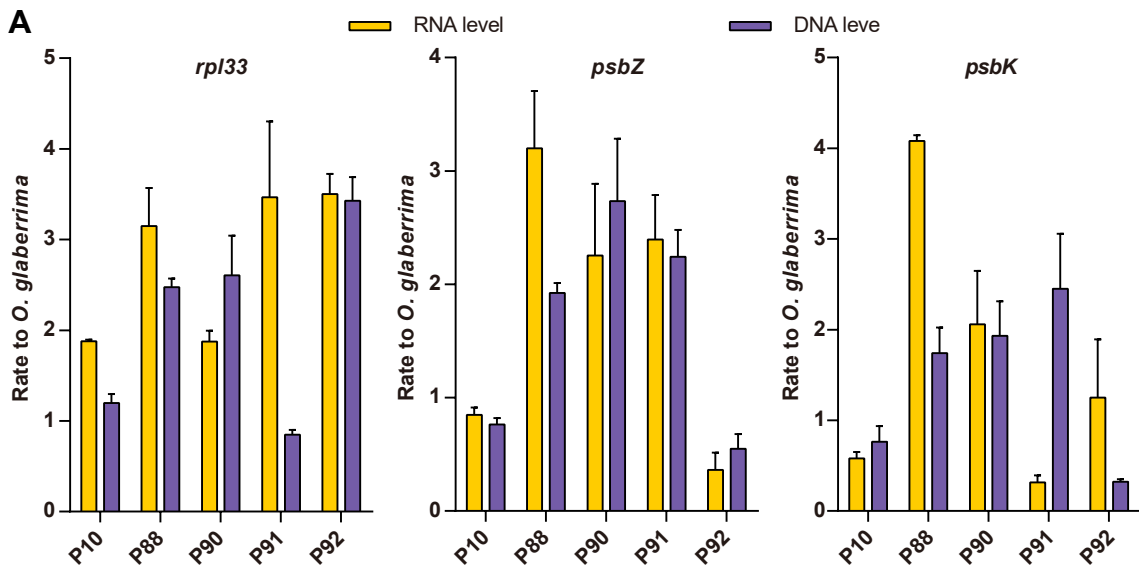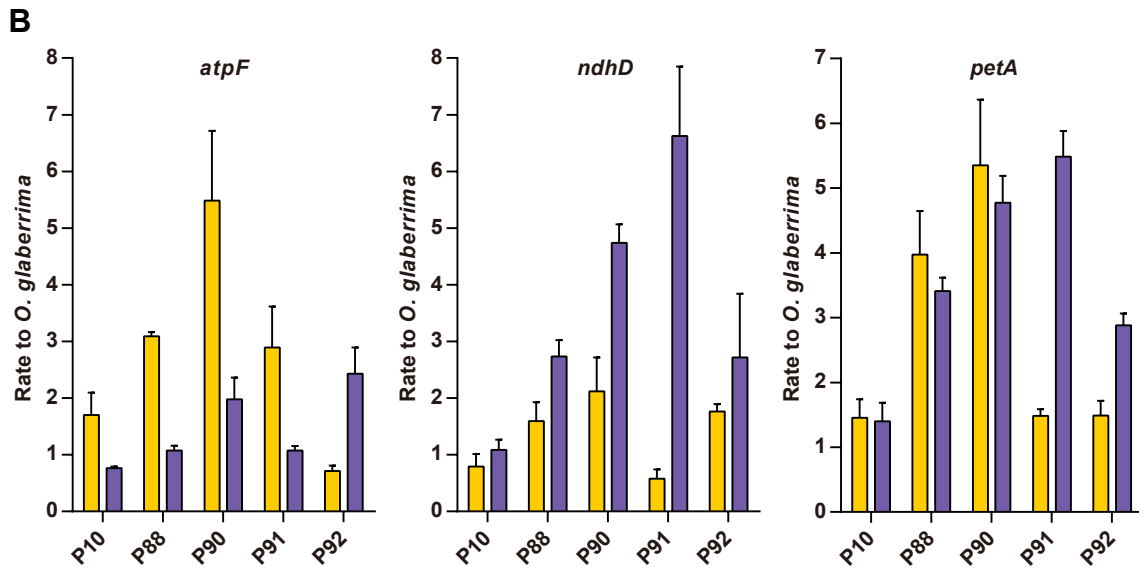

Supplement: s1 [file s1]

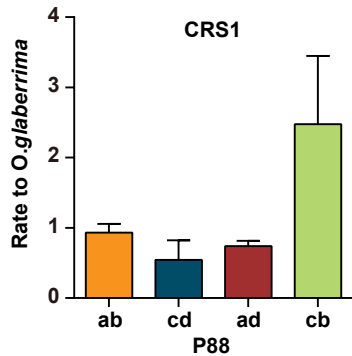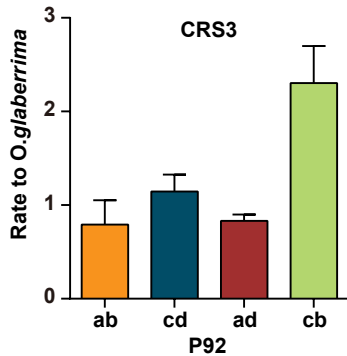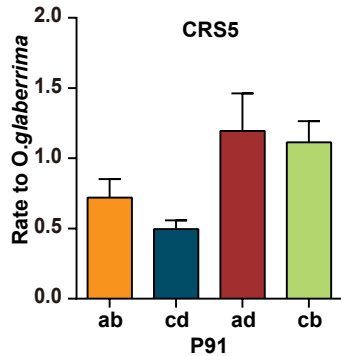

Supplement: s1 [file s1]
